# Supplementary material for: Increased Medial Orbitofrontal and Amygdala Activation: Evidence for a Systems-Level Endophenotype of Bipolar I Disorder
Source: Atypon-hosted journal article supplement (doi:10.1176/appi.ajp.2011.11050711), 2012-01-23
Supplement: appi.ajp.2011.11050711_ds001.pdf [file appi.ajp.2011.11050711_ds001.pdf]

**SUPPLEMENTAL MATERIAL**

**Figure 1: Flow diagram of the selection process.** Showing number of persons that were approached screened and analyzed. \*) Patients, who did not meet inclusion criteria were asked, whether their relatives might be interested in participation.

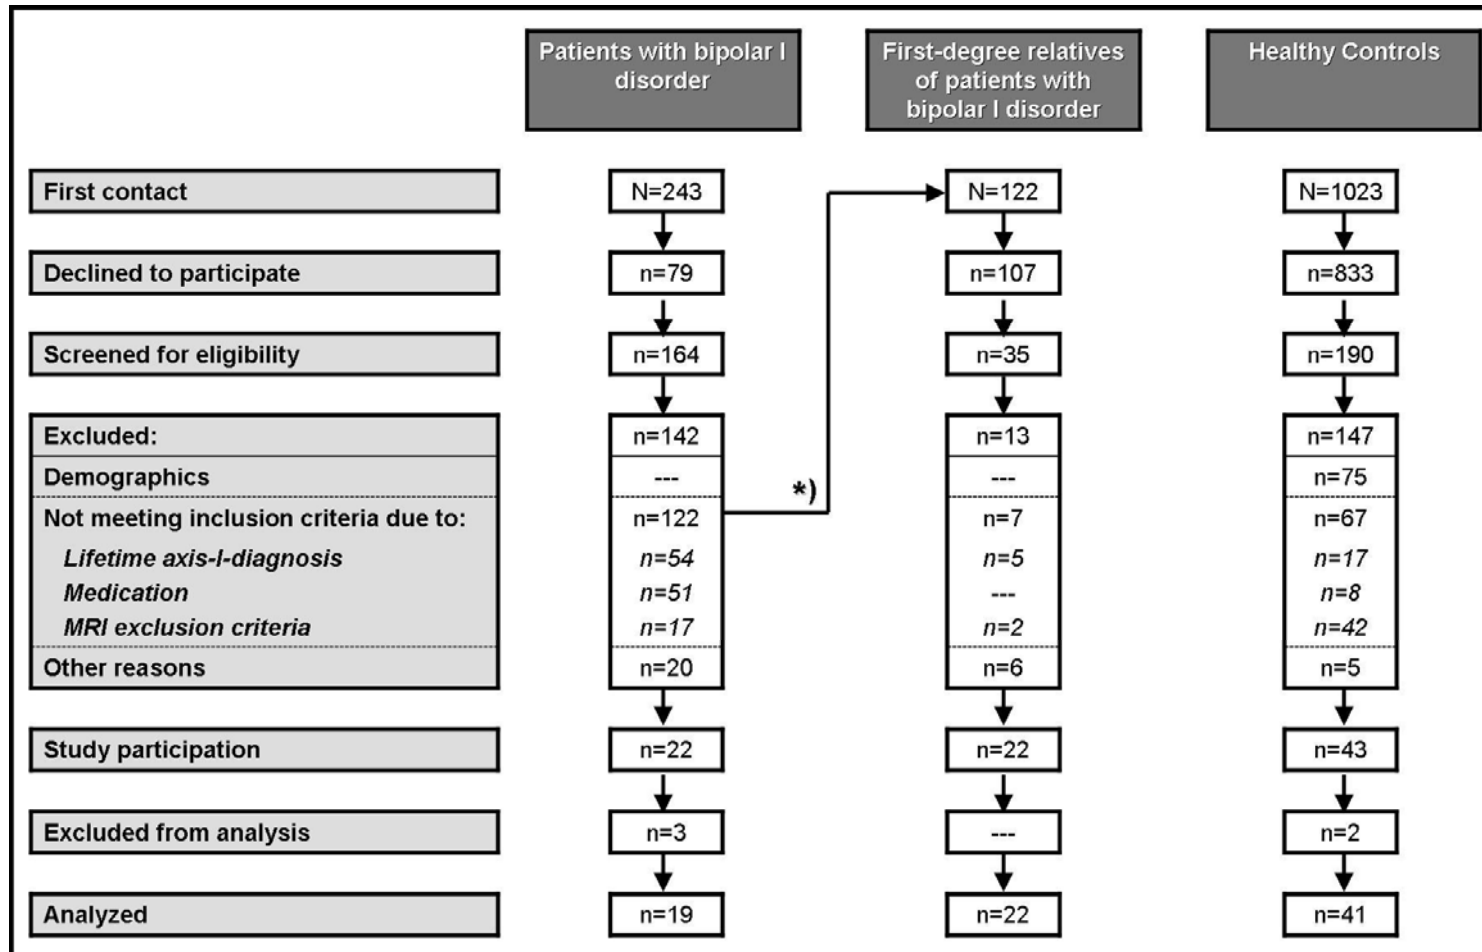

**Figure 2: Correlation between mean reward contrast value and medication load among euthymic patients with bipolar disorder.**

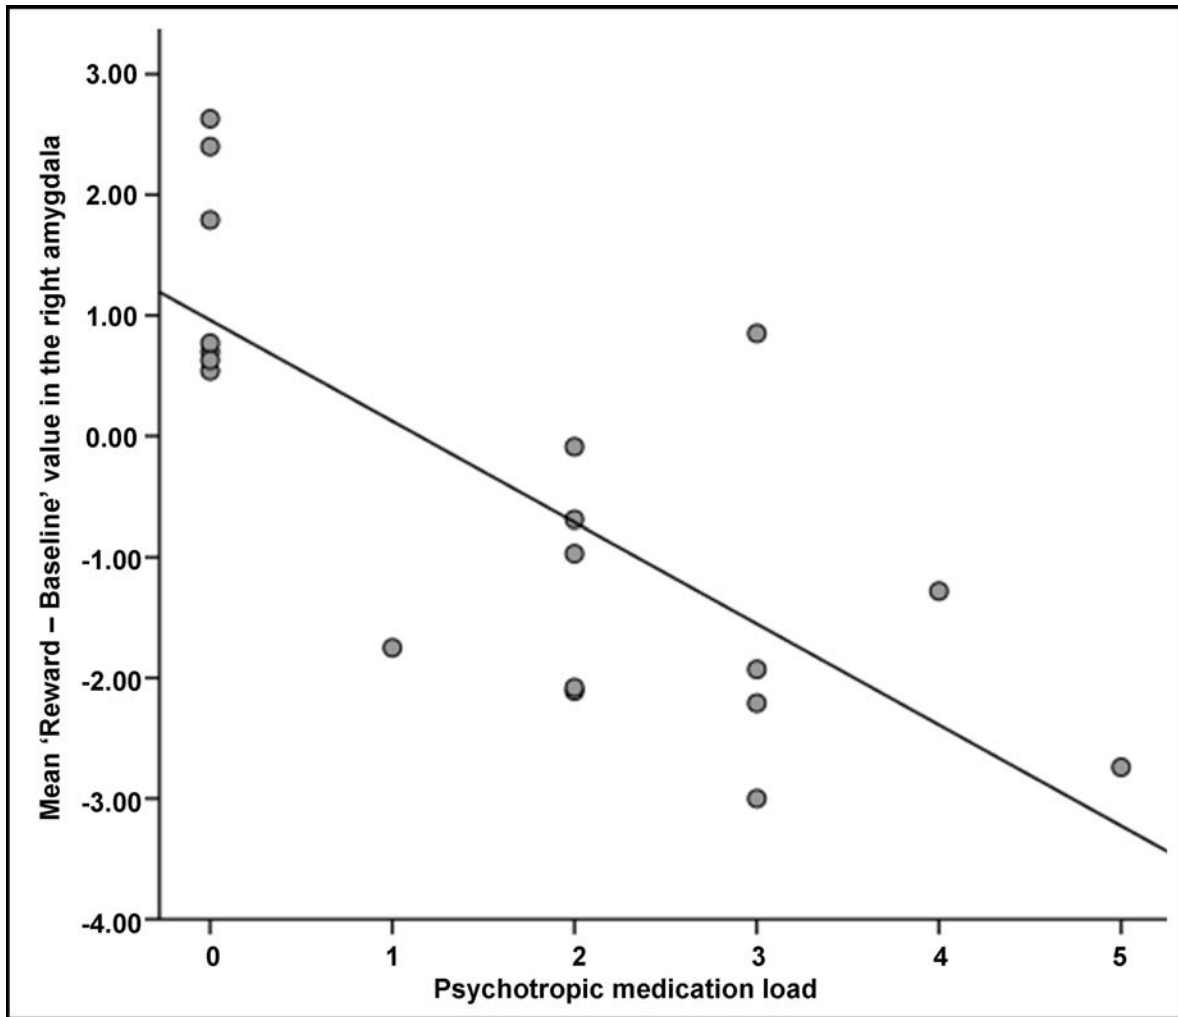

**Table 1:** Results of the correlation analysis between ratings on the behavioral activation system scale and activation during the reversal learning paradigm for bipolar patients and relatives

| Bipolar patients and relatives                               |         |             |    |    |       |                     |    |
|--------------------------------------------------------------|---------|-------------|----|----|-------|---------------------|----|
| (n = 41)                                                     |         |             |    |    |       |                     |    |
| L/R                                                          | Brodman | MNI         |    |    | z     | cluste              |    |
|                                                              | Area    | coordinates |    |    | value | r size <sup>b</sup> |    |
|                                                              |         | x           | Y  | Z  |       |                     |    |
| <b>Reward: Correct responses – Baseline<sup>a</sup></b>      |         |             |    |    |       |                     |    |
| medial orbitofrontal cortex                                  | L       | 11          | -3 | 27 | -15   | 3.41                | 27 |
| <b>Rule Reversal: ‘NF with shift’ – Baseline<sup>a</sup></b> |         |             |    |    |       |                     |    |
| medial orbitofrontal cortex                                  |         | 11          | 0  | 30 | -15   | 3.21                | 23 |

**Abbreviations:** L, left; R, right.

<sup>a</sup> Significance at  $p < 0.05$  (FWE-corrected for anatomical region of interest).

<sup>b</sup> Number of voxels
